# Supplementary material for: Redundant and incoherent regulations of multiple phenotypes suggest microRNAs’ role in stability control
Source: HighWire-hosted journal article supplement (doi:10.1101/gr.222505.117), 2017-09-13
Supplement: Supplemental_Fig_S1.pdf [file Supplemental_Fig_S1.pdf]

Fig. S1

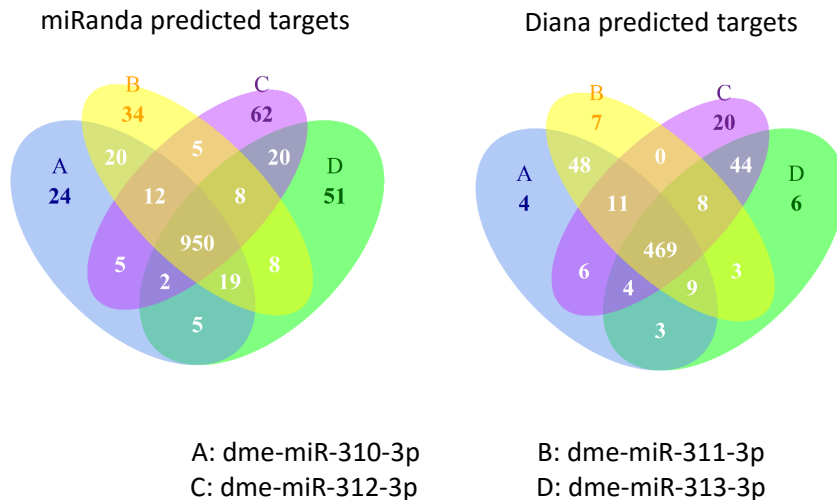

**Figure S1. Venn diagram of predicted targets of miR310/311/312/313. In**

*D.melanogaster*, target genes of 4 members of miR310 cluster were predicted by miRanda (left) and Diana (right) respectively (see Methods). Unlike TargetScan which does prediction mainly depending on the seed regions of miRNAs, these two algorithms also take non-seed regions into consideration. Although the total numbers of targets predicted by the two algorithms are varied, any two of the four groups share more than 90% of predicted targets.
