# Supplementary material for: Redundant and incoherent regulations of multiple phenotypes suggest microRNAs’ role in stability control
Source: HighWire-hosted journal article supplement (doi:10.1101/gr.222505.117), 2017-09-13
Supplement: Supplemental_Fig_S2.pdf [file Supplemental_Fig_S2.pdf]

Fig. S2

**A**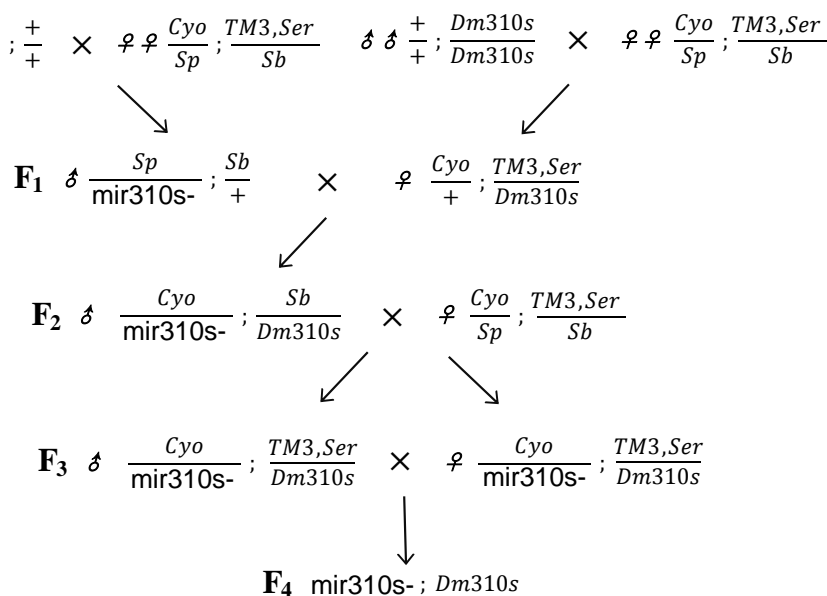**B**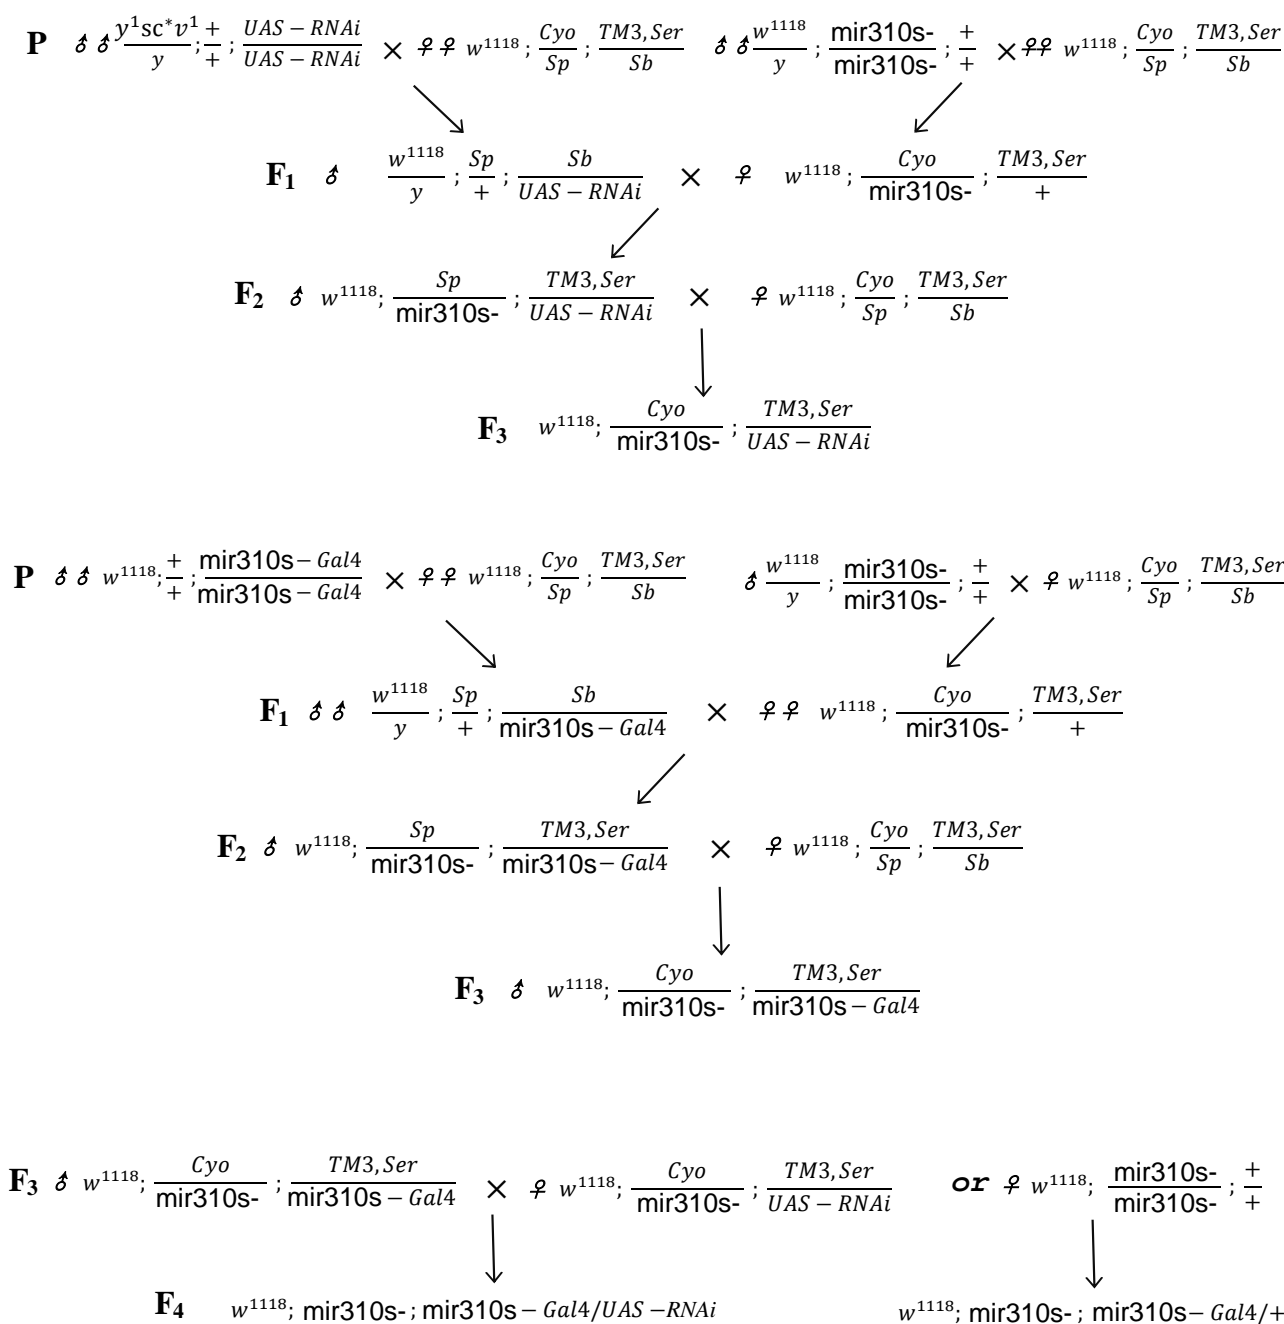

**Figure S2. Cross scheme for constructing the rescue lines. (A)** Introducing Dm310s (mir310s from *D.melanogaster*, here after) to mir310s- background. Mir310s- and the Dm310s transgenic lines (Tang et al. 2010) were crossed with double balancer *Cyo/Sp, TM3,Ser/Sb*. We obtained the rescue line with genotype mir310s-;Dm310s at F<sub>4</sub> generation. The cross scheme for Dp310s (mir310s from *D.pseudoobscura*, here after) rescue line is the same, but using the Dp310s transgenic males (Tang et al. 2010) as F<sub>1</sub>. **(B)** The cross scheme for constructing the RNAi rescue lines and their corresponding control line. At generation F<sub>4</sub>, we obtained target RNAi rescue flies of the genotype mir310s-; mir310s-Gal4/UAS-RNAi, and the control flies of mir310s-;mir310s-Gal4/+. Virgin females were used in these cross schemes.
