# Supplementary material for: Redundant and incoherent regulations of multiple phenotypes suggest microRNAs’ role in stability control
Source: HighWire-hosted journal article supplement (doi:10.1101/gr.222505.117), 2017-09-13
Supplement: Supplemental_Fig_S3.pdf [file Supplemental_Fig_S3.pdf]

Fig. S3

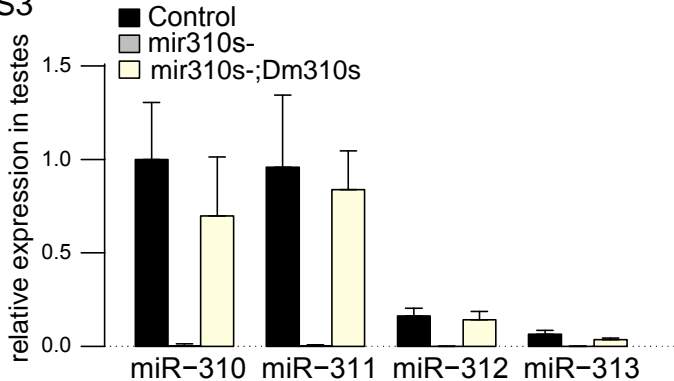

**Figure S3. Relative expression of miR310s was measured by qRT-PCR in testes of 3-day-old males.** Expression of all miR310s members was undetectable in mir310s knockout flies (denoted as mir310s<sup>-</sup>, here after), but was restored close to wildtype level when mir310s was re-introduced (denoted as mir310s<sup>-</sup>; Dm310s, here after). qRT-PCRs were performed in triplicate using 2S RNA as endogenous control, error bars are standard errors, Student's *t*-test doesn't indicate significant difference between control and mir310s<sup>-</sup>;Dm310s.
