# Supplementary material for: Redundant and incoherent regulations of multiple phenotypes suggest microRNAs’ role in stability control
Source: HighWire-hosted journal article supplement (doi:10.1101/gr.222505.117), 2017-09-13
Supplement: Supplemental_Fig_S4.pdf [file Supplemental_Fig_S4.pdf]

Fig. S4

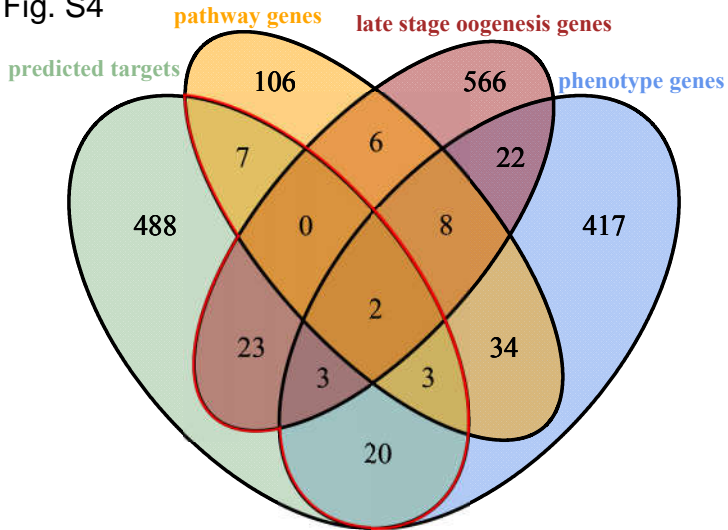

**Figure S4. Venn diagram of miR310s predicted targets and 3 groups of candidate targets.** Predicted targets come from three prediction tools: TargetScan, PicTar, and PITA (Grun et al. 2005; Lewis et al. 2005; Kertesz et al. 2007; Kheradpour et al. 2007; Ruby et al. 2007). Pathway genes are those involved in the KEGG signaling pathways critical for oogenesis and spermatogenesis; late stage oogenesis genes are those expressed in late stage oogenesis (Yakoby et al. 2008; Tootle et al. 2011); and phenotype genes are those may produce phenotypes during oogenesis (see Methods for more details). The overlap of predicted targets and 3 other groups, including 58 genes, were highlighted with red wireframe. By excluding 13 lowly expressed genes and adding two validated target genes (Robins et al. 2005; Tsurudome et al. 2010), we finally obtain 47 candidate targets for further expression analysis (Methods).
