# Supplementary material for: Redundant and incoherent regulations of multiple phenotypes suggest microRNAs’ role in stability control
Source: HighWire-hosted journal article supplement (doi:10.1101/gr.222505.117), 2017-09-13
Supplement: Supplemental_Fig_S5.pdf [file Supplemental_Fig_S5.pdf]

Fig. S5

Color Key

0.5 1 1.5 2 2.5 (Value)


relative expression  
in oogenesis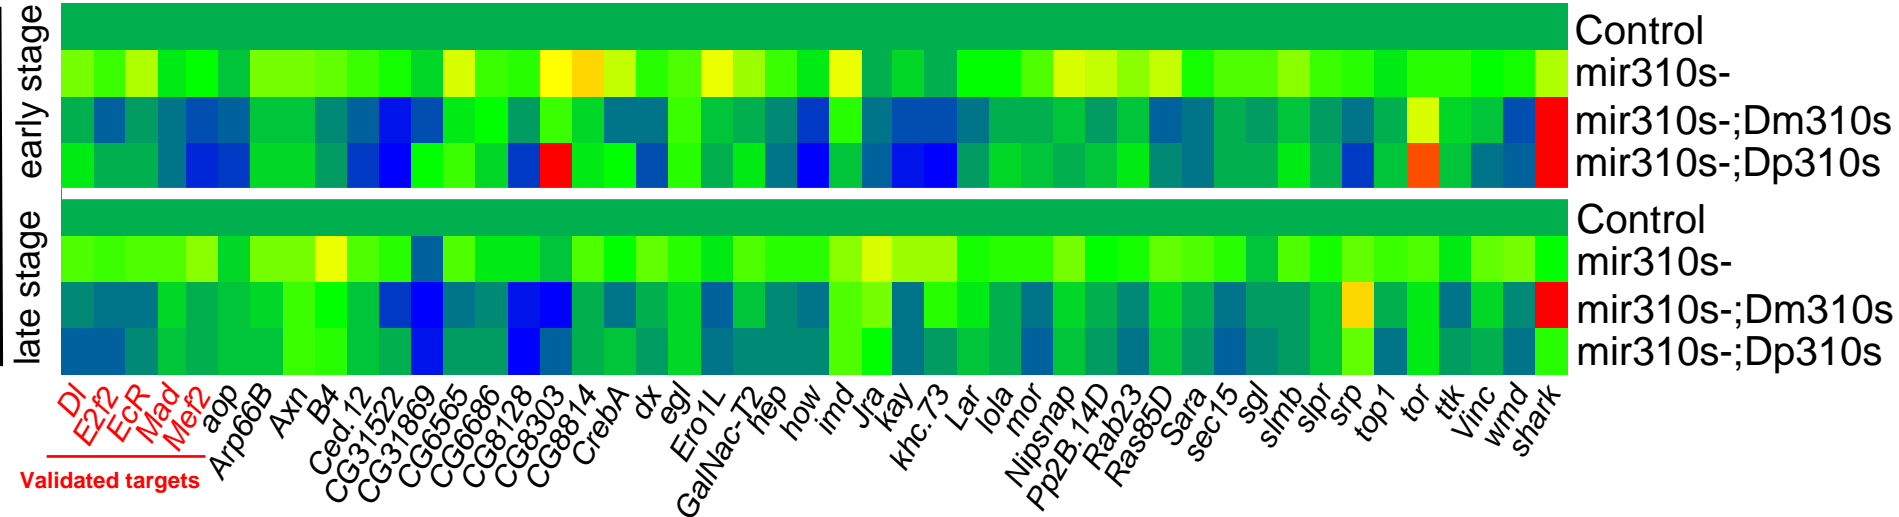

**Figure S5. Relative expression of 47 candidate targets measured by qRT-PCR in early and late stages of oogenesis.** For each gene, expression in control flies was set as 1, and relative expression in other three lines was obtained by the  $2^{-\Delta\Delta CT}$  method (Livak and Schmittgen 2001). Color key indicated relative expression level. The five targets placed on the left in red were selected for further experimental validation.

Most of these genes were up-regulated in both early and late stage oogenesis of *mir310s*-, and were repressed when *Dm310s* or *Dp310s* was re-introduced (denoted as *mir310s*;-*Dm310s* or *mir310s*;-*Dp310s*, respectively), indicating most of them were directly regulated by *miR310s* (except for *CG8303*, *tor*, *shark* at early stage, and *srp*, *shark* at late stage). qRT-PCR was performed in triplicate, using the house keeping gene *rp49* as endogenous control.
