# Supplementary material for: Redundant and incoherent regulations of multiple phenotypes suggest microRNAs’ role in stability control
Source: HighWire-hosted journal article supplement (doi:10.1101/gr.222505.117), 2017-09-13
Supplement: Supplemental_Fig_S7.pdf [file Supplemental_Fig_S7.pdf]

Fig. S7

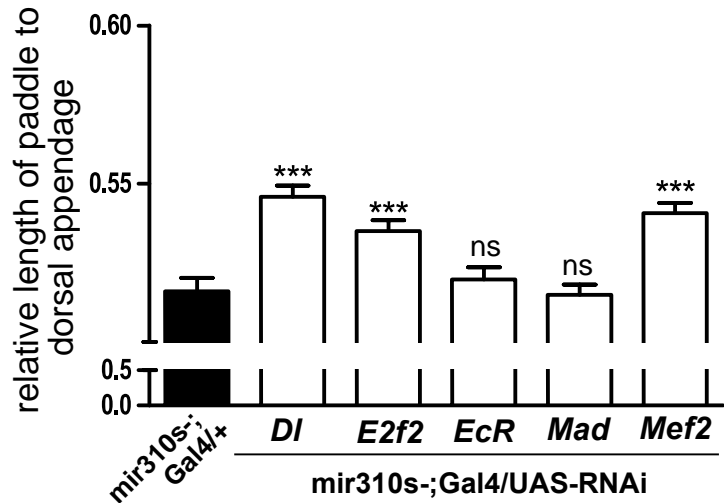

**Figure S7. Relative length of paddle to whole dorsal appendage.** For each genotypes, we divide the length of paddles by that of whole dorsal appendage to obtain the relative length (represented by y-axis). RNAi of each targets were driven by Gal4/UAS system. RNAi of *Dl*, *E2f2* and *Mef2* significantly rescued the relative length, while RNAi of *EcR* and *Mad* had no obvious effect. (More than 200 eggs were examined for each genotype, bar graphs show the mean and standard errors, \*\*\* $p < 0.001$  for unpaired two-tailed Student's *t*-test).
