# Supplementary material for: Redundant and incoherent regulations of multiple phenotypes suggest microRNAs’ role in stability control
Source: HighWire-hosted journal article supplement (doi:10.1101/gr.222505.117), 2017-09-13
Supplement: Supplemental_Fig_S8.pdf [file Supplemental_Fig_S8.pdf]

Fig. S8

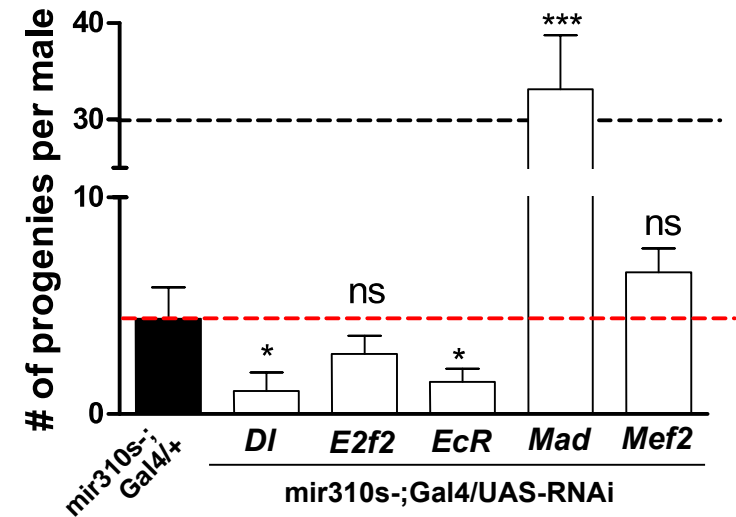

**Figure S8. Male fertility in the second-round mating assay.** Average numbers of progenies per male were counted. The red dotted line indicates the value of mir310s-males and hence demarcates positive or negative rescue. The black line indicates that value of wildtype males, and hence denote full rescue. *Mad* RNAi show full rescue, while *Dl* and *EcR* RNAi aggravate the defect (negative rescue). Rescue effect of *E2f2* and *Mef2* RNAi is weak and statistically insignificant. (More than 15 males were examined for each genotype, bar graphs show the mean and error bars indicate standard errors, \* $p < 0.05$ , \*\* $p < 0.001$ ; ns, not significant for Student's *t*-test).
