# Supplementary material for: Redundant and incoherent regulations of multiple phenotypes suggest microRNAs’ role in stability control
Source: HighWire-hosted journal article supplement (doi:10.1101/gr.222505.117), 2017-09-13
Supplement: Supplemental_Table_S1.docx [file Supplemental_Table_S1.docx]

**Table S1. Primers used in miRNA qRT-PCR detection**

| **miRNA/sRNA** | **Primer** | **Sequence** |
| --- | --- | --- |
| miR310 | RT primer | GTCGTATCCAGTGCAGGGTCCGAGGTATTCGCACTGGATACGACAAAGGC |
| Forward primer | CGTGGCTATTGCACACTTCCCG |
| Reverse primer | GTGCAGGGTCCGAGGT |
| miR311 | RT primer | GTCGTATCCAGTGCAGGGTCCGAGGTATTCGCACTGGATACGACTCAGGC |
| Forward primer | CGCCGTATTGCACATTCACCG |
| Reverse primer | GTGCAGGGTCCGAGGT |
| miR312 | RT primer | GTCGTATCCAGTGCAGGGTCCGAGGTATTCGCACTGGATACGACTCAGGC |
| Forward primer | CGGCGTATTGCACTTGAGACG |
| Reverse primer | GTGCAGGGTCCGAGGT |
| miR313 | RT primer | GTCGTATCCAGTGCAGGGTCCGAGGTATTCGCACTGGATACGACTCGGGC |
| Forward primer | GCGCCGGTATTGCACTTTTCACA |
| Reverse primer | GTGCAGGGTCCGAGGT |
| 2s RNA | RT primer | GTCGTATCCAGTGCAGGGTCCGAGGTATTCGCACTGGATACGACTACAAC |
| Forward primer | GCGGCTGCTTGGACTACATATGG |
| Reverse primer | GTGCAGGGTCCGAGGT |
