# Supplementary material for: Redundant and incoherent regulations of multiple phenotypes suggest microRNAs’ role in stability control
Source: HighWire-hosted journal article supplement (doi:10.1101/gr.222505.117), 2017-09-13
Supplement: Supplemental_Table_S2.docx [file Supplemental_Table_S2.docx]

**Table S2. List of the 47 candidate targets of miR310s.**

| **Symbol** | **Flybase ID** | **Name** | **Conservation*** |
| --- | --- | --- | --- |
| ***Dl*** | FBgn0000463 | Delta | *Der* |
| ***E2f2*** | FBgn0024371 | E2F transcription factor 2 | *Dmo* |
| ***EcR*** | FBgn0000546 | Ecdysone receptor | *Dmo* |
| ***Mad*** | FBgn0011648 | Mothers against dpp | *Dps* |
| ***Mef2*** | FBgn0011656 | Myocyte enhancer factor 2 | *Dmo* |
| *aop* | FBgn0000097 | anterior open | *Dya* |
| *Arp66B* | FBgn0262716 | Actin-related protein 3 | *Dmo* |
| *Axn* | FBgn0026597 | Axin | *Dmo* |
| *B4* | FBgn0023407 | B4 | *Dmo* |
| *Ced-12* | FBgn0032409 | Ced-12 | *Dmo* |
| *CG31522* | FBgn0051522 | - | *Dan* |
| *CG31869* | FBgn0051869 | - | *Dmo* |
| *CG6565* | FBgn0032513 | - | *Dmo* |
| *CG6686* | FBgn0032388 | - | *Dmo* |
| *CG8128* | FBgn0084727 | - | *Dan* |
| *CG8303* | FBgn0034143 | - | *Dmo* |
| *CG8814* | FBgn0031478 | Cyclic-AMP response element binding protein A | *Dmo* |
| *CrebA* | FBgn0004396 | - | *Dmo* |
| *dx* | FBgn0000524 | deltex | *Dgr* |
| *egl* | FBgn0000562 | egalitarian | *Dmo* |
| *Ero1L* | FBgn0261274 | Endoplasmic reticulum oxidoreductin-1-like | *Dgr* |
| *GalNAc-T2* | FBgn0030930 | UDP-N-acetyl-α-D-galactosamine:polypeptide N-acetylgalactosaminyltransferase 2 | *Dvi* |
| *hep* | FBgn0010303 | hemipterous | *Dps* |
| *how* | FBgn0264491 | held out wings | *Dmo* |
| *imd* | FBgn0013983 | immune deficiency | *Dps* |
| *Jra* | FBgn0001291 | Jun-related antigen | *Dps* |
| *kay* | FBgn0001297 | kayak | *Dmo* |
| *Khc-73* | FBgn0019968 | Kinesin heavy chain 73 | *Dmo* |
| *Lar* | FBgn0000464 | Leukocyte-antigen-related-like | *Dmo* |
| *lola* | FBgn0005630 | longitudinals lacking | *Dmo* |
| *mor* | FBgn0002783 | moira | *-* |
| *Nipsnap* | FBgn0030724 | Nipsnap | *Dya* |
| *Pp2B-14D* | FBgn0011826 | Protein phosphatase 2B at 14D | *Dmo* |
| *Rab23* | FBgn0037364 | Rab23 | *Dmo* |
| *Ras85D* | FBgn0003205 | Ras oncogene at 85D | *Dmo* |
| *Sara* | FBgn0026369 | Smad anchor for receptor activation | *Dmo* |
| *sec15* | FBgn0266674 | Sec15 ortholog (S. cerevisiae) | *-* |
| *sgl* | FBgn0261445 | sugarless | *Dmo* |
| *shark* | FBgn0015295 | SH2 ankyrin repeat kinase | *Dmo* |
| *slmb* | FBgn0023423 | supernumerary limbs | *Dgr* |
| *slpr* | FBgn0030018 | slipper | *Dan* |
| *srp* | FBgn0003507 | serpent | *Dmo* |
| *Top1* | FBgn0004924 | Topoisomerase 1 | *Dmo* |
| *tor* | FBgn0003733 | torso | *Dmo* |
| *ttk* | FBgn0003870 | tramtrack | *Dmo* |
| *Vinc* | FBgn0004397 | Vinculin | *Dmo* |
| *wmd* | FBgn0034876 | wing morphogenesis defect | *Dwi* |

* Conservation here represented by the species with the same target sites but most divergent from *D.melanogaster* in phylogeny. *Der, Drosophila erecta, Dmo, Drosophila mojavensis, Dps, Drosophila pseudoobscura, Dya, Drosophila yakuba, Dan, Drosophila ananassae, Dgr, Drosophila grimshawi, Dvi, Drosophila virilis, Dwi, Drosophila willistoni.*
