# Supplementary material for: Redundant and incoherent regulations of multiple phenotypes suggest microRNAs’ role in stability control
Source: HighWire-hosted journal article supplement (doi:10.1101/gr.222505.117), 2017-09-13
Supplement: Supplemental_Table_S3.docx [file Supplemental_Table_S3.docx]

**Table S3. Primers used in mRNA qRT-PCR detection**

| **Gene** | **Forward Primer** | **Reverse Primer** |
| --- | --- | --- |
| *Mad* | GACGAAGAGGAGAAGTGGGC | GGGAGACCTGTAATCGTCCG |
| *E2f2* | CCTGAAAGCGGCAACCAAAA | GCACTAGGGAGCAGTGTCTG |
| *Dl* | GCGCGCACCAACAAGCTCCT | GCCCGTCTCCGAGCAAGTCG |
| *EcR* | TAACGGCCAACTGATTGTACG | GCGGCCAAGACTTTGTTAAGA |
| *Mef2* | CAAGCTGTACCAGTACGCCA | GTTCGCGGAGTGAGTGTGTA |
| *aop* | CTGGATAATACTGCTGGT | CATTTGTATTGGGCTCAG |
| *Arp66B* | GGGACGCATTAAGCCAAA | TGACACACCTGATAGAACTC |
| *Axn* | GGCGCCATGAGTCTAAGCGGAC | TTCGAGGCCGTGCTAGAGCCA |
| *B4* | AGGGATGCCTGCCCATAAAC | TCCCTTCCCATGTACCCACT |
| *Ced-12* | ACGACGGTTAAGGATTCACACA | CTGGATTTTACTTGCCAGCGG |
| *CG31522* | CCGGAGAATGGTTCATGCCT | GGATGACGTGCAGTGTGGTA |
| *CG31869* | CGGCCACAAACGAACAGAAT | GACCTCGTCGCTGTTGGTTA |
| *CG6565* | ATTGTCTGCGACCGTTGGAT | CGTCGAATCGAGCATAAACCTTG |
| *CG6686* | GGAGCAGGATGGGCTAATGA | CTAGTCTTTCCTGCGCCCT |
| *CG8128* | GGCTCGCAGAACCGTACTTA | TCCATGGTTTTGGAGGACGA |
| *CG8303* | GACACTATTGCTTGCCGCAC | GTGGGCAAAGAACTCCGGTA |
| *CG8814* | GAACTTTGGCACCACAGCAG | TCAATCGCCGCCATACCTAA |
| *CrebA* | GCCAAGATCGAGGACATGGA | GAGGTGTTTAGGGCGGGATT |
| *dx* | AAGGTTGGCAATCAGCCCAT | AGTCCCGATGCAATGTCGTA |
| *egl* | CTTGCTGCGGTATATG | GCTCTTGTTCATCCTC |
| *Ero1L* | AACTGCTTCTGCGAGTTGGA | ATCGCACAGCGACTGTCATC |
| *GalNAc-T2* | ATGGAGGCTACAGGTGAGGT | CGGCCGGTACTCAAAGTTCT |
| *hep* | GATGCAGGCTGGTTCAACAC | GCCGTTATTCACAACGCTCC |
| *how* | TGGACGAAGAAATTGCACGC | TTCATCGTCACCACAGAGCC |
| *imd* | CAGATCGACCAGGCCATAAT | TTCTCCAGTGCCTTCCAAAC |
| *Jra* | AAGCAAAGTTCCCACCCACT | GGATTCGGGGTGGATGTGTT |
| *Khc-73* | CATATGTGGACGGACTGTCG | GTCGCCTGATCCGTGAGTAT |
| *kay* | ATGAACGAGGAGCAGGACAC | GAGCCGGCGTATTTGAGGTA |
| *Lar* | CCACCGGTGAGACAAAAATGG | CCTTGTAGCCGGTCACTTGT |
| *lola* | ATACGTCTGGCGATGTGTCC | CGGACGAGTTTGAGTTGTCG |
| *mor* | CCAGTGGCTGCAGAAGAACT | CAGAAAGCAACGCATCGGAAT |
| *Nipsnap* | CGAAATGCGCTCATACCGAC | GGGTCTCCTTACGGTCTTGC |
| *Pp2B-14D* | CGAGGATCCGAATCAGCACA | CCAATTCAGACCTCGCCAGA |
| *Rab23* | ACGAGCAACAGATCGAATTTGG | CAGGCAAATCGGTTGGAGGA |
| *Ras85D* | ATATCGGCACCTACCGTGAG | GTCTTGGCGGATGTCTCAAT |
| *Sara* | GTGTGAAAAAGGTTTCTGCGG | TGCCGCTGCATTTCTACTCA |
| *sec15* | CGATCCTTGAAGGCAACAACA | AGGGACGTGTCCAAGGAATG |
| *sgl* | GCATTGGCGCTGGTTATGTC | CCAAGCCGGGCTCGTAAAT |
| *shark* | GCGGCCTCGGGGTTGGTTTT | AACTTGGACCCGCCCGACTG |
| *slmb* | TGCCTACAGTACAGAGA | TCAGACAGAGAGTATTGG |
| *slpr* | TGATGAAGAGCTGCTGGCAA | TTTCGCGCAAATCGTGTAGC |
| *srp* | AAGGACACCATTCAGAA | GGTTTCATATCGTCATTG |
| *Top1* | CAGGAGCCCGAGCCTGCCGTA | CTCCTCCTCCCACCATCGCCAAA |
| *tor* | ACGTCACCGCTTGCACCCAG | TCCTGCACCTTGCGCAGAGC |
| *ttk* | CACGCAGAAACCTTCACAGA | ATGTCCGAGTAGGGCACATC |
| *Vinc* | AACCTGATGCAGAGCGTGAA | GATGGTCAGGTGCCTTCCTC |
| *wmd* | TGCAAAGATGGCAGCCCGAT | CAGGGTGGCATTTCGGTTCA |
| ***RP49*** | ATGCTAAGCTGTCGCACAAA | GTTCGATCCGTAACCGATGT |
