# Supplementary material for: Redundant and incoherent regulations of multiple phenotypes suggest microRNAs’ role in stability control
Source: HighWire-hosted journal article supplement (doi:10.1101/gr.222505.117), 2017-09-13
Supplement: Supplemental_Table_S4.docx [file Supplemental_Table_S4.docx]

**Table S4. Primers designed for 3’UTRs cloning and target sites mutation**

| Gene | 3’UTR cloning | | Target site mutation primers | |
| --- | --- | --- | --- | --- |
| Primer | Sequence | Primer | Sequence |
| *Dl* | Forward | TACAAAGAGCCAAGTCGC | FM | GATTTTACAAAAACGTTACTTAGGAATTAT |
| Reverse | GCCTGCAATACCCATACCAC | RM | ATAATTCCTAAGTAACGTTTTTGTAAAATC |
| *E2f2* | Forward | TTGCGAGCTGTTTGATGTTC | FM | GGCCGCGTGCATTGACGTTATATTTATGAT |
| Reverse | TGGTTTTGCTGTTATTTGCG | RM | ATCATAAATATAACGTCAATGCACGCGGCC |
| *EcR* | Forward | GATGGCCTTGATGGGTGTAG | FM | TACTTGAATTCACGTTATTTTTACTTT |
| Reverse | CTTCCCACGAACGTCTTTGT | RM | AAAGTAAAAATAACGTGAATTCAAGTA |
| *Mad* | Forward | GACAAGGTGCTCACCCAAAT | FM | TGAAAACACTTATACGTTATCATTTCTTAA |
| Reverse | AGTTTTGCCCAAGCCTCTAA | RM | TTAAGAAATGATAACGTATAAGTGTTTTCA |
| *Mef2* | Forward | TGCTGAATGTCCGAGTGTCT | FM for site 1 | TTCCGGACCACACGTTAAGTTGAGAGAGGA |
| RM for site 1 | TCCTCTCTCAACTTAACGTGTGGTCCGGAA |
| Reverse | AAGCTGCAAATTAACGCCCA | FM for site 2 | TAATTTGTAATTCTCACGTTATTATTGTCA |
| RM for site 2 | TGACAATAATAACGTGAGAATTACAAATTA |
