# Supplementary material for: Redundant and incoherent regulations of multiple phenotypes suggest microRNAs’ role in stability control
Source: HighWire-hosted journal article supplement (doi:10.1101/gr.222505.117), 2017-09-13
Supplement: Supplemental_Text_S1.docx [file Supplemental_Text_S1.docx]

**Supplemental Text S1. The biological functions of 5 validated targets of miR310s.**

Of the 47 candidate targets of miR310s (Fig. S4, S5), five were selected for further target validation and phenotypic rescuing. Delta *(Dl)* acts as a ligand for the Notch receptor and is involved in the differentiation of the anterior follicle cells through the JAK/STAT signaling pathway ([Torres et al. 2003](#_ENREF_6)). E2F transcription factor 2 *(E2f2)* is a transcriptional repressor that participates in a multi-protein complex to regulate gene expression and DNA replication ([Beall et al. 2007](#_ENREF_1)). Ecdysone receptor *(EcR)* is receptor for ecdysone. EcR is required for normal oogenesis ([Carney and Bender 2000](#_ENREF_2)) and egg hatching ([Li and Bender 2000](#_ENREF_3)). Mothers against dpp *(Mad)* plays an important role in mediating *Dpp* signaling and is involved in the *BMP* signaling pathway ([Matunis et al. 1997](#_ENREF_5)). Myocyte enhancer factor 2 *(Mef2*) is a transcription factor that interacts with the *DPP*-signaling ([Mantrova et al. 1999](#_ENREF_4)).

The five genes are chosen not as a random sample of all target genes. They are among the best-known and well-understood transcription factors and, hence, may interact more extensively with downstream genes. In other words, they are chosen for their possible involvement in the phenotypes we study. That said, the list is far from exhaustive. Many other genes in Supplemental Table S2 are also TFs and many are part of the same signaling pathways. Most important, there was no evidence that these 5 genes would enhance/reduce the phenotypes in the same direction. Our goal is to show target genes can interact with redundancy and incoherence and we found such evidence in these five genes. Whether other genes may or may not behave similarly will need to be investigated at a later time.

**References:**

Beall EL, Lewis PW, Bell M, Rocha M, Jones DL, Botchan MR. 2007. Discovery of tMAC: a Drosophila testis-specific meiotic arrest complex paralogous to Myb-Muv B. *Genes & development* **21**(8): 904-919.

Carney GE, Bender M. 2000. The Drosophila ecdysone receptor (EcR) gene is required maternally for normal oogenesis. *Genetics* **154**(3): 1203-1211.

Li T, Bender M. 2000. A conditional rescue system reveals essential functions for the ecdysone receptor (EcR) gene during molting and metamorphosis in Drosophila. *Development* **127**(13): 2897-2905.

Mantrova EY, Schulz RA, Hsu T. 1999. Oogenic function of the myogenic factor D-MEF2: negative regulation of the decapentaplegic receptor gene thick veins. *Proceedings of the National Academy of Sciences of the United States of America* **96**(21): 11889-11894.

Matunis E, Tran J, Gonczy P, Caldwell K, DiNardo S. 1997. punt and schnurri regulate a somatically derived signal that restricts proliferation of committed progenitors in the germline. *Development* **124**(21): 4383-4391.

Torres IL, Lopez-Schier H, St Johnston D. 2003. A Notch/Delta-dependent relay mechanism establishes anterior-posterior polarity in Drosophila. *Dev Cell* **5**(4): 547-558.
