# Supplementary material for: Redundant and incoherent regulations of multiple phenotypes suggest microRNAs’ role in stability control
Source: HighWire-hosted journal article supplement (doi:10.1101/gr.222505.117), 2017-09-13
Supplement: Supplemental_Text_S2.docx [file Supplemental_Text_S2.docx]

**Supplemental Text S2. Technical issues of Hunter et al. vs. Ecsedi et al.**

Hunter et al. rescue the rupture phenotype of *let-7**(n2853)* by feeding interfering RNAs to the worms and may not have restored the target gene expression to the “wildtype” pattern ([Hunter et al. 2013](#_ENREF_2)). Ecsedi et al. eliminated the let-7 target site of *lin-41* *in vivo* using the CRISPR method ([Ecsedi et al. 2015](#_ENREF_1)). The elevation in *lin-41* expression is hence “wildtype”. Unlike other studies supporting the “simple regulation” model (Fig. 1A), Ecsedi et al. (2015) further attempted to rule out the involvement of all other target genes by conducting a “double mutant” assay (see their Fig. 5), which, by matching the mutation in the seed of *let-7 [n2853]* with a corresponding mutation in the target site of *lin-41*. In such situation, all let-7 targets except for *lin-41* were dysregulated in *let-7(n2853)*, and the rupture phenotype was indeed restored to wildtype. However, because the *let-7(n2853)* construct is likely a partial loss-of-function mutation retaining some of the original repression effects as well as a gain-of-function construct repressing additional targets, it is by no means convincing that the double-mutant assay indeed negates the involvement of all other targets, which Hunter et al. identified.

**References:**

Ecsedi M, Rausch M, Grosshans H. 2015. The let-7 microRNA directs vulval development through a single target. *Dev Cell* **32**(3): 335-344.

Hunter SE, Finnegan EF, Zisoulis DG, Lovci MT, Melnik-Martinez KV, Yeo GW, Pasquinelli AE. 2013. Functional genomic analysis of the let-7 regulatory network in Caenorhabditis elegans. *PLoS genetics* **9**(3): e1003353.
