# Supplementary material for: Redundant and incoherent regulations of multiple phenotypes suggest microRNAs’ role in stability control
Source: HighWire-hosted journal article supplement (doi:10.1101/gr.222505.117), 2017-09-13
Supplement: Supplemental_Text_S3.docx [file Supplemental_Text_S3.docx]

**Supplemental Text S3. Testing the models of Fig. 1 by altering target genes expression**

This section addresses the means of testing the models of Fig. 1. All means need to alter the relationship between miRNAs and their targets. A method not used here is the genome-editing technique, such as CRISPR, which can alter the binding site sequence, thus permitting it to escape miRNA repression.

An application of this approach can be found in Ecsedi et al. ([Ecsedi et al. 2015](#_ENREF_1)). Such an application requires the test be conducted in the wildtype background with the intact miRNA. However, the appropriate background as described in the main text is the mir310s knockout background (in consideration of epistatic target interactions). Therefore, the genome editing method cannot be used. After all, in the absence of the miRNAs, deleting the target sites would have no consequence. There are additional concerns about using the genome-editing technique even when one would conduct the test in the wildtype mir310s background. For example, there are often multiple target sites in the same gene and some may not be the canonical sequences. Indeed, *Mef2* used in our study has two miR310s binding site. In short, false negatives would be common by genome-editing; indeed, in Ecsedi et al., the target expression was only partially restored. In contrast, RNAi directly represses gene expression and does not depend on target site numbers.

We would like to note that Ecsedi et al.-like experiments are not as easily interpretable as often believed. Accompanying the target-site editing, investigators would change the miRNA itself to match the editing. This is where the problems may lie – the introduction of an artificial new miRNA into the network (see Text S2). This artificial miRNA may overlap partially with the original miRNA in targeting but may also have many new targets. The interpretation of the results is likely fraught with uncertainties. Finally, since the genome-editing experiments are labor-intensive, for such efforts to be worthwhile, they need to yield much cleaner and more easily interpretable results than they do in the context of this study.

In this study, we used transgenic RNAi flies from the Transgenic RNAi Project (TRiP; ([Ni et al. 2011](#_ENREF_9); [Flockhart et al. 2012](#_ENREF_2); [Perkins et al. 2015](#_ENREF_10)), a widely used resource ([Muerdter et al. 2013](#_ENREF_7); [Staller et al. 2013](#_ENREF_12); [Mohr 2014](#_ENREF_5); [Shulman et al. 2014](#_ENREF_11); [Yan et al. 2014](#_ENREF_13)). The reviewer asked about the extent of off-target repressions associated with this library. Off-target repression is an issue we are very conscious of when designing the experiments. In a separate study ([Li et al. 2015](#_ENREF_4)), we experimentally and systematically tested the off-target effects of various sequences vis-à-vis the on-target repressions. Our experience suggests that the TRiP project should satisfy our need with respect to on- and off-targeting ratios. In the first place, the hairpin RNAs were designed to prevent off-targeting matches ([Ni et al. 2009](#_ENREF_8)). In its wide usage, the TRiP project libraries have been validated for their low off-targeting noises ([Kulkarni et al. 2006](#_ENREF_3); [Ni et al. 2009](#_ENREF_8); [Mohr and Perrimon 2012](#_ENREF_6); [Perkins et al. 2015](#_ENREF_10)). For this study, we have consulted the TRiP website (<http://www.flyrnai.org/RNAi_find_frag_free.html>) and found the five predicted targets (*Dl, E2f2, EcR, Mad, Mef2*) in our study are well within the design limit of TRiP.

We now address the issue of whether the restoration of target gene expression is good enough for our purpose. The efficacy of RNAi is mainly determined by the appropriate promoter. In this study, we used a Gal4 under the mir310s promoter (mir310s-Gal4) to drive UAS-RNAi, which ensures the restorations of target expression are close to the de-repression by native miR310s. Indeed, the difference in target expression between the rescue and the wild type lines center around 0 among the five targets (Fig. 5B). Most important, the temporal and spatial pattern of expression, driven by the native promoter, should be correct (Fig. 6).

**References:**

Ecsedi M, Rausch M, Grosshans H. 2015. The let-7 microRNA directs vulval development through a single target. *Dev Cell* **32**(3): 335-344.

Flockhart IT, Booker M, Hu Y, McElvany B, Gilly Q, Mathey-Prevot B, Perrimon N, Mohr SE. 2012. FlyRNAi.org--the database of the Drosophila RNAi screening center: 2012 update. *Nucleic acids research* **40**(Database issue): D715-719.

Kulkarni MM, Booker M, Silver SJ, Friedman A, Hong P, Perrimon N, Mathey-Prevot B. 2006. Evidence of off-target effects associated with long dsRNAs in Drosophila melanogaster cell-based assays. *Nature methods* **3**(10): 833-838.

Li C, Liu Z, Yang F, Liu W, Wang D, Dong E, Wang Y, Wu CI, Lu X. 2015. siRNAs with decreased off-target effect facilitate the identification of essential genes in cancer cells. *Oncotarget* **6**(25): 21603-21613.

Mohr SE. 2014. RNAi screening in Drosophila cells and in vivo. *Methods* **68**(1): 82-88.

Mohr SE, Perrimon N. 2012. RNAi screening: new approaches, understandings, and organisms. *Wiley interdisciplinary reviews RNA* **3**(2): 145-158.

Muerdter F, Guzzardo PM, Gillis J, Luo Y, Yu Y, Chen C, Fekete R, Hannon GJ. 2013. A genome-wide RNAi screen draws a genetic framework for transposon control and primary piRNA biogenesis in Drosophila. *Molecular cell* **50**(5): 736-748.

Ni JQ, Liu LP, Binari R, Hardy R, Shim HS, Cavallaro A, Booker M, Pfeiffer BD, Markstein M, Wang H et al. 2009. A Drosophila resource of transgenic RNAi lines for neurogenetics. *Genetics* **182**(4): 1089-1100.

Ni JQ, Zhou R, Czech B, Liu LP, Holderbaum L, Yang-Zhou D, Shim HS, Tao R, Handler D, Karpowicz P et al. 2011. A genome-scale shRNA resource for transgenic RNAi in Drosophila. *Nature methods* **8**(5): 405-407.

Perkins LA, Holderbaum L, Tao R, Hu Y, Sopko R, McCall K, Yang-Zhou D, Flockhart I, Binari R, Shim HS et al. 2015. The Transgenic RNAi Project at Harvard Medical School: Resources and Validation. *Genetics* **201**(3): 843-852.

Shulman JM, Imboywa S, Giagtzoglou N, Powers MP, Hu Y, Devenport D, Chipendo P, Chibnik LB, Diamond A, Perrimon N et al. 2014. Functional screening in Drosophila identifies Alzheimer's disease susceptibility genes and implicates Tau-mediated mechanisms. *Human molecular genetics* **23**(4): 870-877.

Staller MV, Yan D, Randklev S, Bragdon MD, Wunderlich ZB, Tao R, Perkins LA, Depace AH, Perrimon N. 2013. Depleting gene activities in early Drosophila embryos with the "maternal-Gal4-shRNA" system. *Genetics* **193**(1): 51-61.

Yan D, Neumuller RA, Buckner M, Ayers K, Li H, Hu Y, Yang-Zhou D, Pan L, Wang X, Kelley C et al. 2014. A regulatory network of Drosophila germline stem cell self-renewal. *Developmental cell* **28**(4): 459-473.
