# Supplementary material for: Redundant and incoherent regulations of multiple phenotypes suggest microRNAs’ role in stability control
Source: HighWire-hosted journal article supplement (doi:10.1101/gr.222505.117), 2017-09-13
Supplement: Supplemental_Text_S4.docx [file Supplemental_Text_S4.docx]

**Text S4. Relationship between miR310s and the ancestral miR-92a/b**

The mirNA-310 cluster (mir310s) was duplicated from mir-92a/b in the ancestor of modern Drosophila. miR310s and miR-92a/b share a common seed but are separate clusters on different chromosomes. Previous studies have shown distinctive phenotypes in different tissues associated with the two clusters which have hence been treated as different functional units in most previous studies([Tang et al. 2010](#_ENREF_5); [Tsurudome et al. 2010](#_ENREF_6); [Chen et al. 2012](#_ENREF_2); [Arif et al. 2013](#_ENREF_1); [Pancratov et al. 2013](#_ENREF_4); [Yuva-Aydemir et al. 2015](#_ENREF_7); [Cicek et al. 2016](#_ENREF_3)). In this context, our focus is the phenotypes associated with the mir310s deletion in the background of mir-92a/b presence.

References:

Arif S, Murat S, Almudi I, Nunes MD, Bortolamiol-Becet D, McGregor NS, Currie JM, Hughes H, Ronshaugen M, Sucena E et al. 2013. Evolution of mir-92a underlies natural morphological variation in Drosophila melanogaster. *Current biology : CB* **23**(6): 523-528.

Chen Z, Liang S, Zhao Y, Han Z. 2012. miR-92b regulates Mef2 levels through a negative-feedback circuit during Drosophila muscle development. *Development* **139**(19): 3543-3552.

Cicek IO, Karaca S, Brankatschk M, Eaton S, Urlaub H, Shcherbata HR. 2016. Hedgehog Signaling Strength Is Orchestrated by the mir-310 Cluster of MicroRNAs in Response to Diet. *Genetics* **202**(3): 1167-1183.

Pancratov R, Peng F, Smibert P, Yang S, Jr., Olson ER, Guha-Gilford C, Kapoor AJ, Liang FX, Lai EC, Flaherty MS et al. 2013. The miR-310/13 cluster antagonizes beta-catenin function in the regulation of germ and somatic cell differentiation in the Drosophila testis. *Development* **140**(14): 2904-2916.

Tang T, Kumar S, Shen Y, Lu J, Wu ML, Shi S, Li WH, Wu CI. 2010. Adverse interactions between micro-RNAs and target genes from different species. *Proceedings of the National Academy of Sciences of the United States of America* **107**(29): 12935-12940.

Tsurudome K, Tsang K, Liao EH, Ball R, Penney J, Yang JS, Elazzouzi F, He T, Chishti A, Lnenicka G et al. 2010. The Drosophila miR-310 Cluster Negatively Regulates Synaptic Strength at the Neuromuscular Junction. *Neuron* **68**(5): 879-893.

Yuva-Aydemir Y, Xu XL, Aydemir O, Gascon E, Sayin S, Zhou W, Hong Y, Gao FB. 2015. Downregulation of the Host Gene jigr1 by miR-92 Is Essential for Neuroblast Self-Renewal in Drosophila. *PLoS genetics* **11**(5): e1005264.
